# Supplementary material
Source: MDPI journal article supplement (https://www.mdpi.com/2075-163X/11/9/994)
Supplement: s1 [file s1]

**Table S1 .** Concentrations of uranium (U) and thorium (Th) in the soils and crops studied.

| Sample Type | Description              | U                   | Th          |
|-------------|--------------------------|---------------------|-------------|
|             |                          | mg kg <sup>-1</sup> |             |
| Soils       | Oil palm cultivation     | 2.15 ± 0.19         | 7.25 ± 4.12 |
|             | Reference area           | 1.51 ± 0.25         | 5.79 ± 2.91 |
|             | Black pepper cultivation | 3.48 ± 0.30         | 10.7 ± 5.04 |
|             | Reference area           | 1.71 ± 0.15         | 6.64 ± 3.25 |
|             | Citrus cultivation       | 2.19 ± 0.20         | 9.00 ± 1.33 |
|             | Reference area           | 2.99 ± 0.47         | 10.3 ± 1.87 |
| Crops       | Oil Palm                 | 0.04 ± 0.00         | 0.10 ± 0.03 |
|             | Black Pepper             | 0.05 ± 0.01         | 0.48 ± 0.36 |
|             | Citrus                   | 0.08 ± 0.04         | 0.18 ± 0.08 |

**Table S2.** Activity concentrations, enrichment and bioaccumulation of potassium (<sup>40</sup>K) in the soils and crops studied.

| Sample Type | Description              | Activity (Bq kg <sup>-1</sup> ) | Enrichment | Bioaccumulation |
|-------------|--------------------------|---------------------------------|------------|-----------------|
| Soils       | Oil palm cultivation     | 23.38 ± 0.8                     | 1.50 ± 0.2 | -               |
|             | Reference area           | 15.59 ± 0.5                     | -          | -               |
|             | Black pepper cultivation | 25.98 ± 3.0                     | 1.23 ± 0.1 | -               |
|             | Reference area           | 15.59 ± 2.1                     | -          | -               |
|             | Citrus cultivation       | 18.19 ± 1.3                     | 0.53 ± 0.3 | -               |
|             | Reference area           | 31.17 ± 2.5                     | -          | -               |
| Crops       | Oil Palm                 | 282.74 ± 38.25                  | -          | 12.09 ± 5.1     |
|             | Black Pepper             | 569.66 ± 11.29                  | -          | 21.93 ± 6.7     |
|             | Citrus                   | 539.40 ± 23.91                  | -          | 29.66 ± 8.9     |
